# Supplementary material for: A Critical Role for ZDHHC2 in Metastasis and Recurrence in Human Hepatocellular Carcinoma
Source: Hindawi journal article supplement (doi:10.1155/2014/832712), 2014-01-01
Supplement: f1 [file 832712.f1.pdf]

**Supplementary Table 1**

RT-PCR primers

|                |                        |
|----------------|------------------------|
| GAPDH forward  | AGCCACATCGCTCAGACAC    |
| GAPDH reverse  | GCCCAATACGACCAAATCC    |
| ZDHHC2 forward | TCTTAGGCGAGCAGCCAAGGAT |
| ZDHHC2 reverse | CAGTGATGGCAGCGATCTGGTT |

**Supplementary Table 2**

Clinicopathological Correlation With ZDHHC2 mRNA expression in HCC Cases (Cohort 2)

| Parameters              | Tumor ZDHHC2 expression |      | P-value |
|-------------------------|-------------------------|------|---------|
|                         | Low                     | High |         |
| Age                     |                         |      |         |
| ≤50 year                | 23                      | 8    | 0.542   |
| >50 year                | 16                      | 8    |         |
| Preoperative AFP level  |                         |      |         |
| ≤400 ng/ml              | 18                      | 9    | 0.551   |
| >400 ng/ml              | 20                      | 7    |         |
| Tumor number            |                         |      |         |
| Single                  | 24                      | 8    | 0.431   |
| Multiple                | 15                      | 8    |         |
| Tumor size              |                         |      |         |
| ≤5 cm                   | 20                      | 13   | 0.039   |
| >5 cm                   | 19                      | 3    |         |
| PVTT                    |                         |      |         |
| Absent                  | 30                      | 16   | 0.046   |
| Present                 | 9                       | 0    |         |
| Histopathologic grading |                         |      |         |
| Well + moderately       | 20                      | 4    | 0.074   |
| Poorly                  | 19                      | 12   |         |

AFP, alpha-fetoprotein; PVTT, portal vein tumor thrombi.
